# Supplementary material
Source: PubMed Central journal article supplement (PMC8170508)
Supplement: NIHMS1036731-supplement-1.pdf [file NIHMS1036731-supplement-1.pdf]

## **Supplemental Information**

### **Topoisomerase II-Induced Chromosome Breakage and Translocation Is Determined by Chromosome Architecture and Transcriptional Activity**

**Andres Canela, Yaakov Maman, Shar-yin N. Huang, Gordana Wutz, Wen Tang, Guido Zagnoli-Vieira, Elsa Callen, Nancy Wong, Amanda Day, Jan-Michael Peters, Keith W. Caldecott, Yves Pommier, and André Nussenzweig**

**Fig. S1**

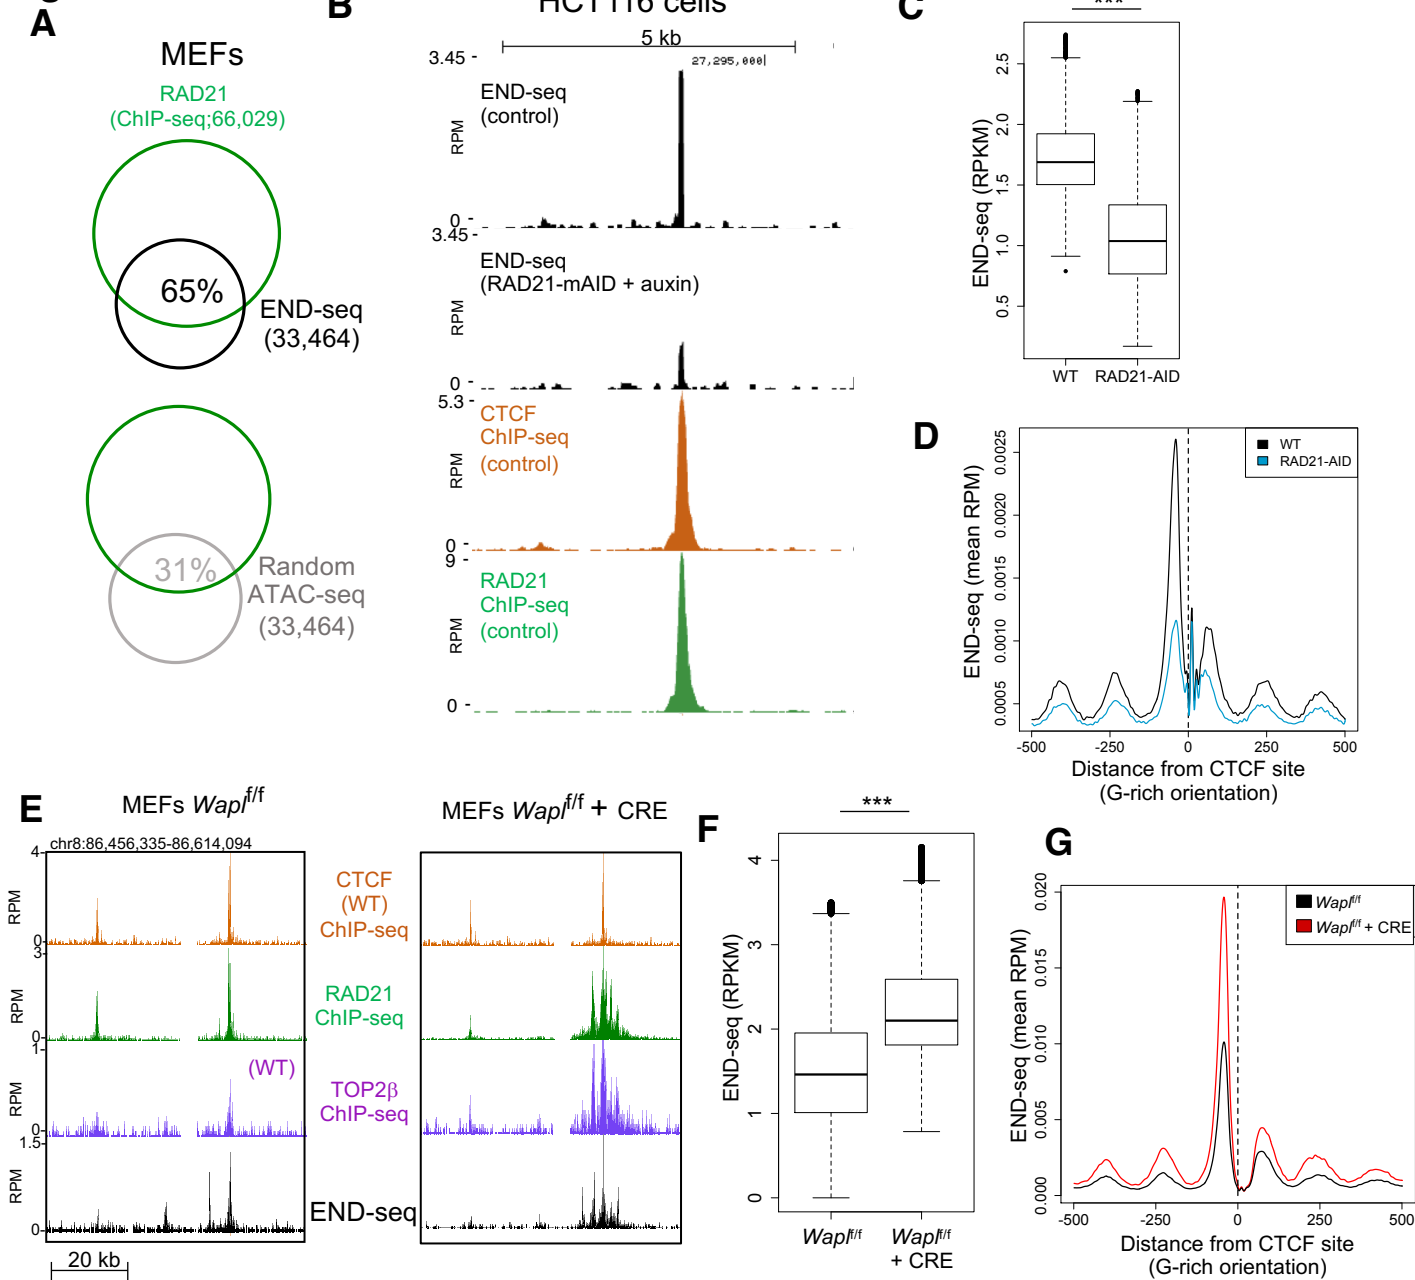

**Fig.S2****Translocations (HTGTS)**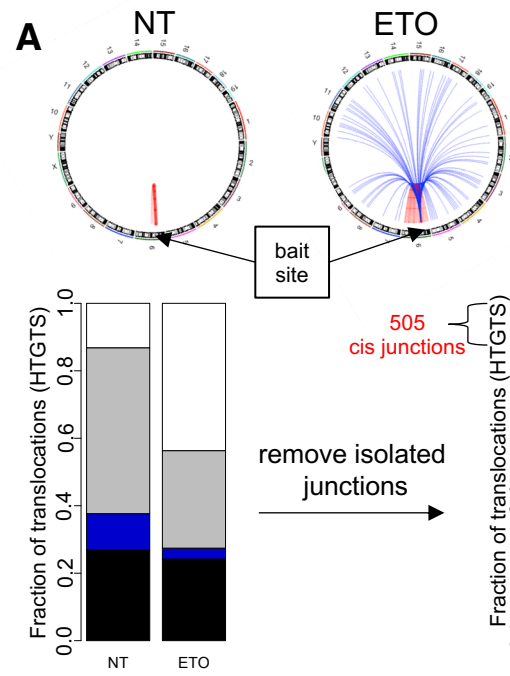**B** chr9:32,369,685-32,841,681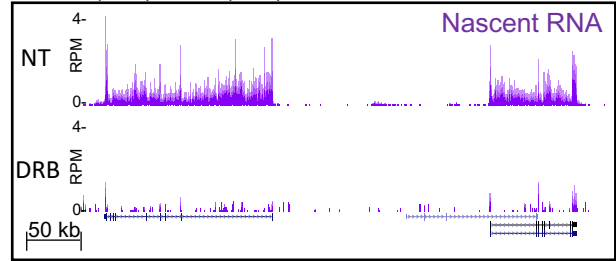

**Fig.S3**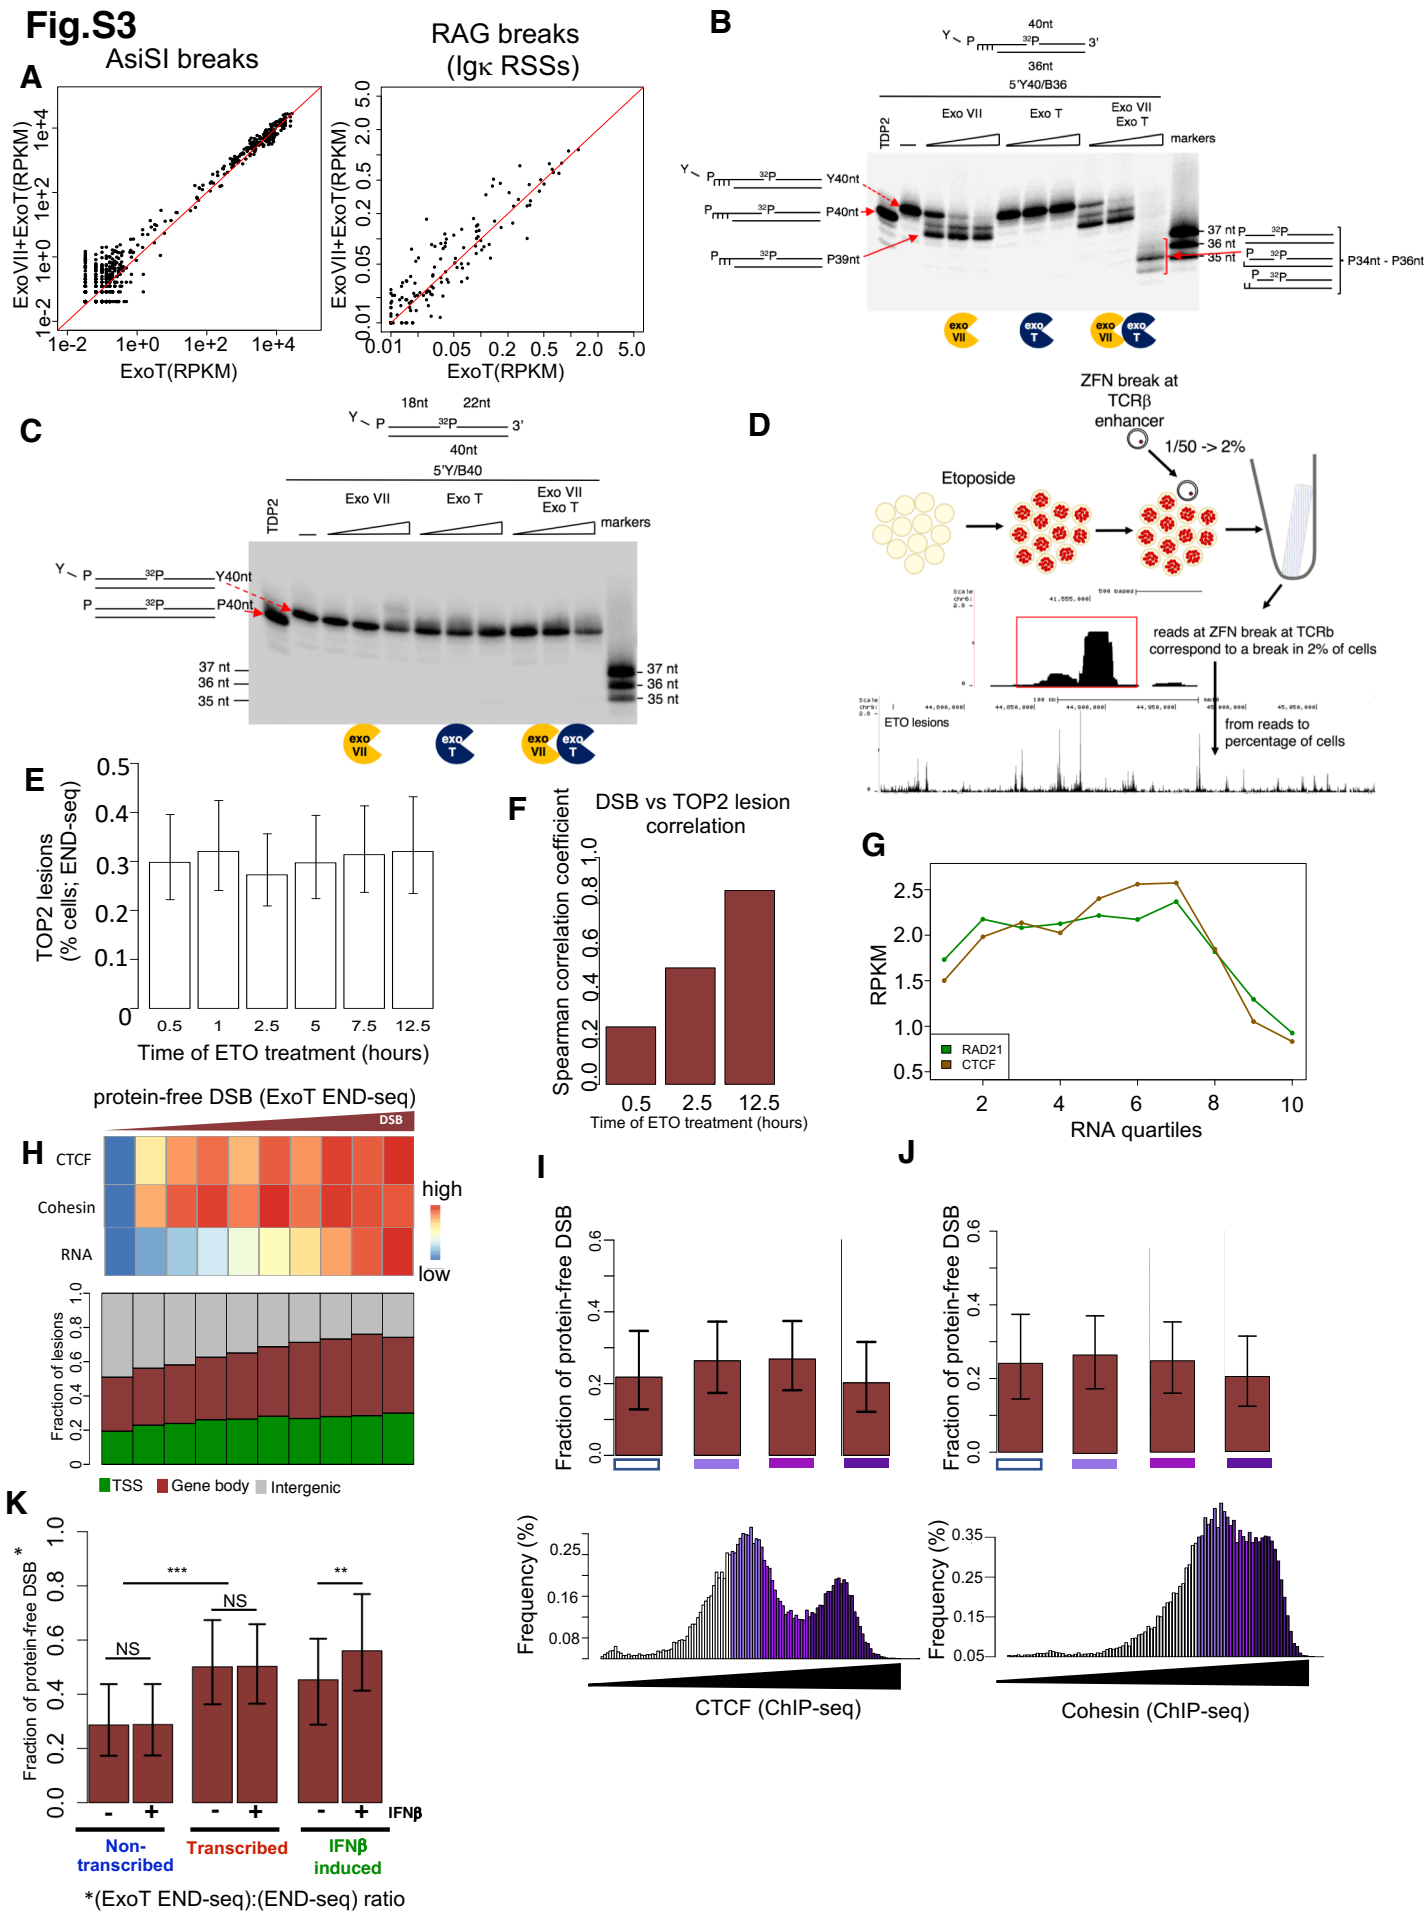

**Fig.S4**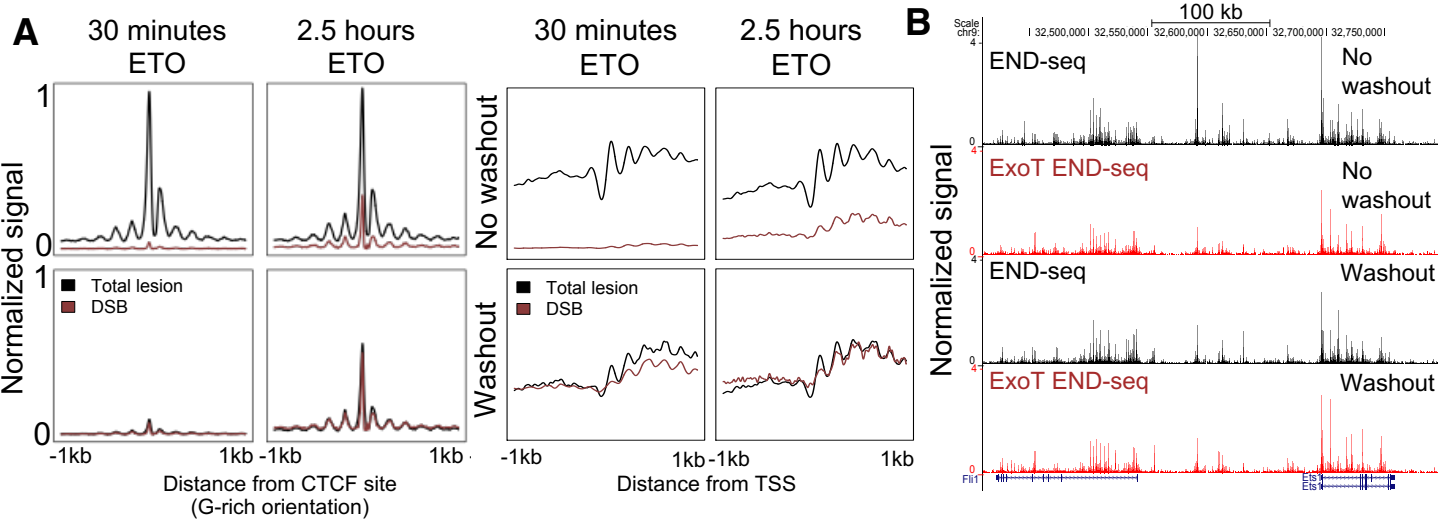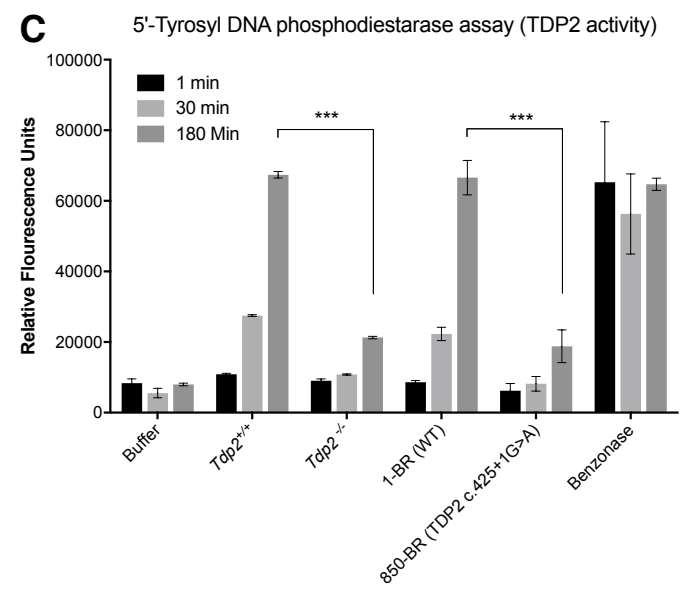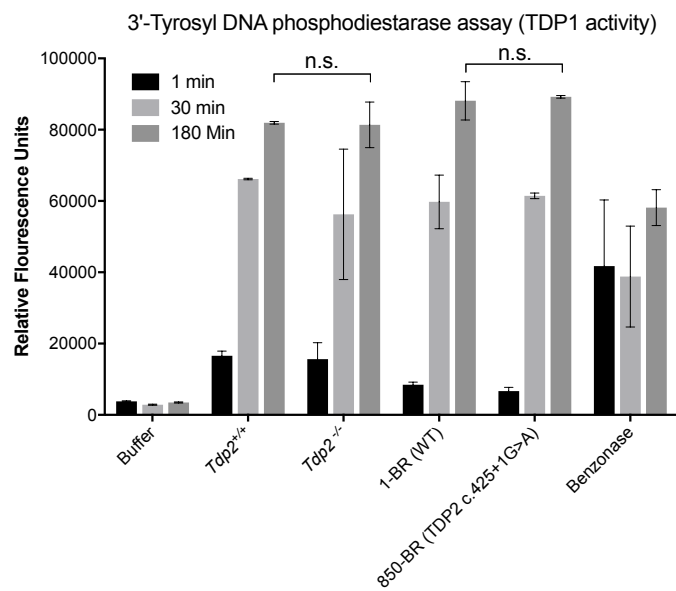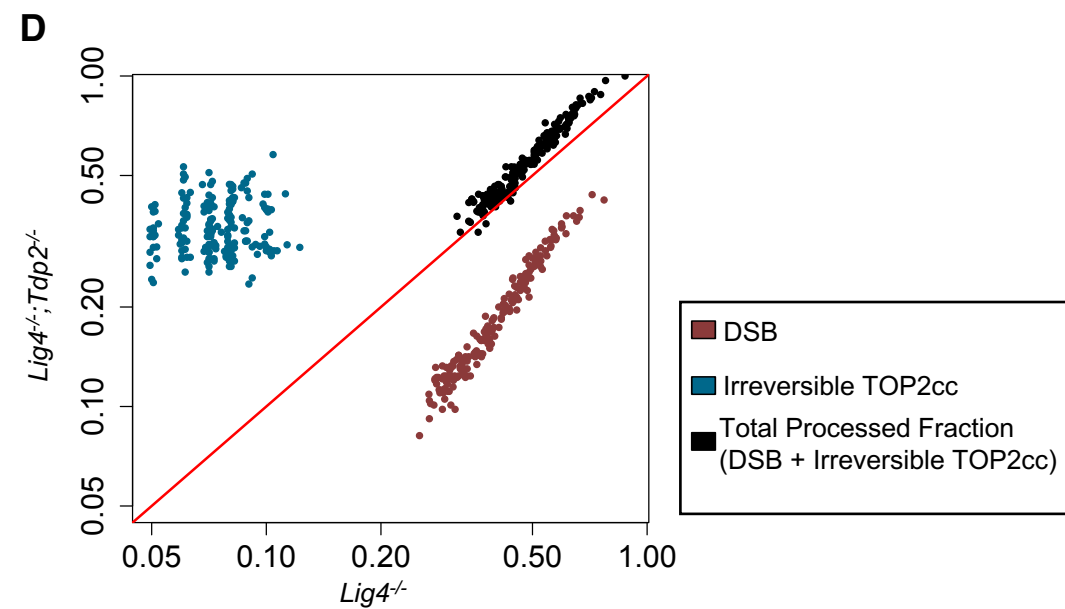

Figure S5

**A**

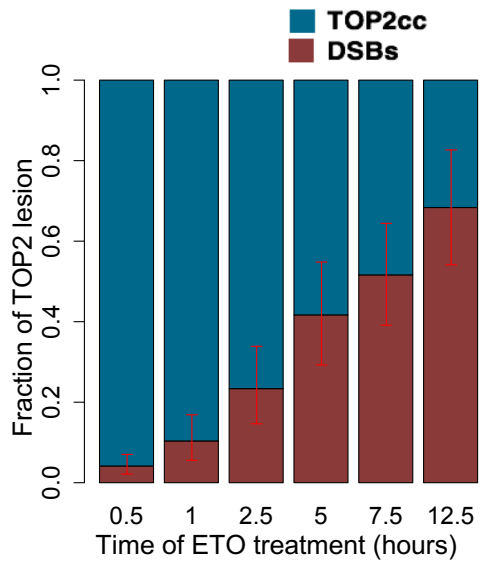

**B**

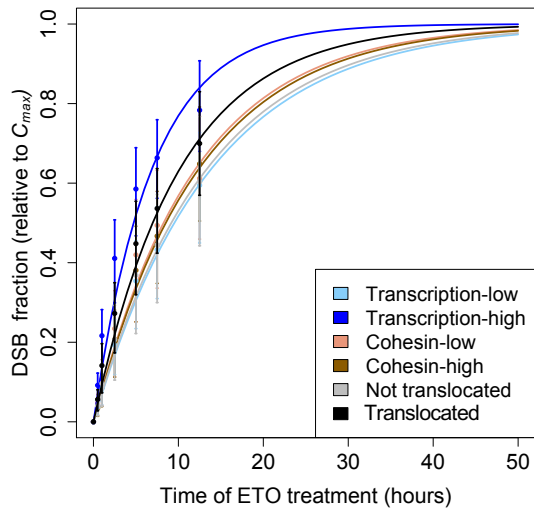

**C**

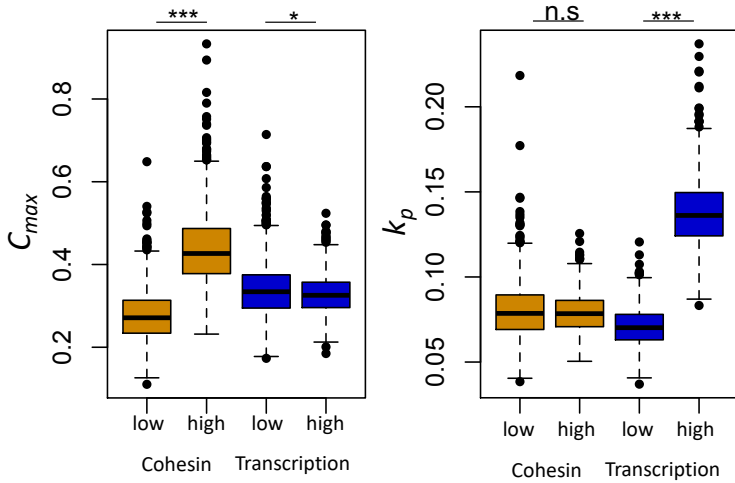

**D**

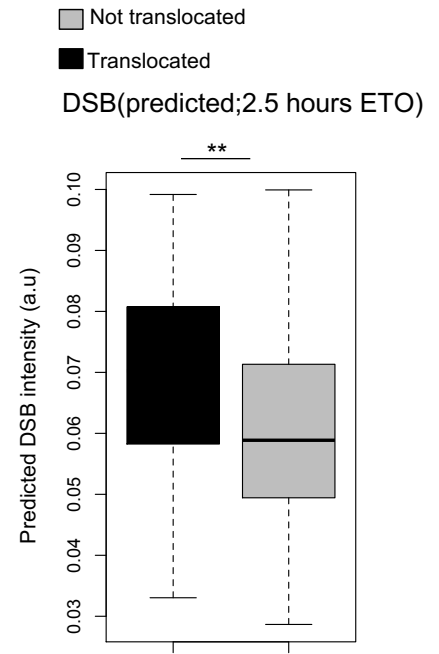

**E**

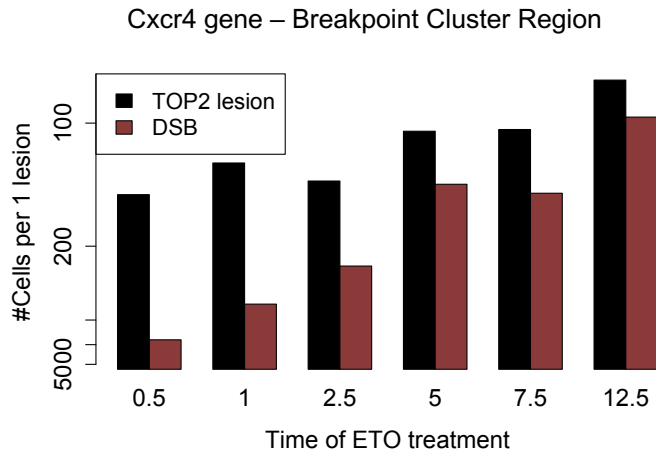

Figure S6

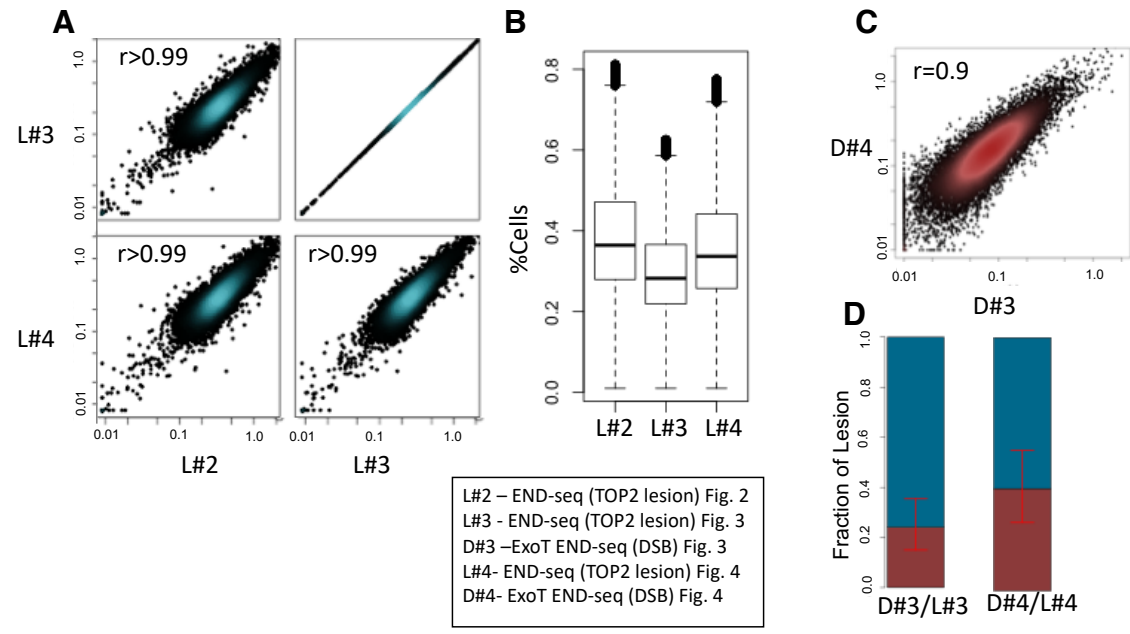

L#2 – END-seq (TOP2 lesion) Fig. 2  
 L#3 - END-seq (TOP2 lesion) Fig. 3  
 D#3 –ExoT END-seq (DSB) Fig. 3  
 L#4- END-seq (TOP2 lesion) Fig. 4  
 D#4- ExoT END-seq (DSB) Fig. 4

Fraction of Lesion

D#3

D#3/L#3 D#4/L#4
